# Supplementary material
Source: Springer Nature journal article supplement (https://www.springermedizin.de/resource/supplementary/13002_2013_339_MOESM1_ESM.pdf/9627668)
Supplement: MOESM1 [file 9627668]

## Appendix 1.

|                    |             |                           |
|--------------------|-------------|---------------------------|
| a) Piso ecológico: | b) Poblado: | c) ID de unidad familiar: |
|--------------------|-------------|---------------------------|

d) Nombre: \_\_\_\_\_ g) Lengua materna: \_\_\_\_\_

e) Ocupación del padre de familia: \_\_\_\_\_ h) Grupo de edad: \_\_\_\_\_

f) Procedencia: \_\_\_\_\_

| Preguntas                                                                                                                                                  | 1                    | 0.5                                 | 0                   |
|------------------------------------------------------------------------------------------------------------------------------------------------------------|----------------------|-------------------------------------|---------------------|
| 1.- ¿Conoce usted hongos de monte? (I 1.1)                                                                                                                 | Si                   |                                     | No                  |
| 2.- ¿Conoce los nombres de los hongos que se comen? (I 1.2)                                                                                                | Si                   |                                     | No                  |
| 3.- ¿Usted o alguien de su familia trae hongos del monte para la casa? (I 1.3)                                                                             | Si                   | Antes sí,<br>ahora no               | No                  |
| 4.- ¿Usted ha comido hongos del monte? (I 1.4)                                                                                                             | Si                   |                                     | No                  |
| 5.- ¿Le gusta comer hongos? (I 1.5)                                                                                                                        | Si                   |                                     | No                  |
| 6.- ¿Los hongos son una comida especial, que le guste mucho? (I 1.6)                                                                                       | Si                   |                                     | No                  |
| 7.- ¿Sabe cómo se cocinan? (I 1.7)                                                                                                                         | Una o<br>más         |                                     | No sabe             |
| 8.- ¿Qué siente usted cuando va al monte y no encuentra hongos que se comen en el monte? (I 1.8)                                                           | +                    | Ningún<br>sentimiento<br>particular | -                   |
| 9.- ¿Existen hongos que hagan daño? (I 2.1)                                                                                                                | Si                   |                                     | No                  |
| 10.- ¿Cómo sabe que hongos hacen daño? (I 2.2)                                                                                                             | +                    |                                     | -                   |
|                                                                                                                                                            | Presencia<br>de con. |                                     | Ausencia<br>de con. |
| 11.- ¿Le preocupa o le da miedo tocar hongos que no conoce? (I 3.1)                                                                                        | No                   |                                     | Si                  |
| 12.- ¿Usted ha escuchado si existen refranes o cuentos sobre los hongos? (I 4.1)                                                                           | +                    | No se                               | -                   |
| 13.- ¿Sabe usted si los hongos tienen otro uso, sirven para otra cosa? (I 5.1)                                                                             | Otras<br>cosas       | No se                               | Nada                |
| 14.- ¿Conoce usted si hay personas aquí en la comunidad que sepan mucho de hongos y que vayan a buscarlos seguido? (I 6.1)                                 | Si                   | No se                               | No                  |
| 15.- ¿Qué hacen los hongos en el monte? ¿Para qué le sirven al bosque los hongos? (I 7.1)                                                                  | +                    | No se                               | -                   |
| 16.- ¿Hay animales que se acerquen a los hongos? ¿Cuáles y por qué? (I 7.2)                                                                                | Si                   | No se /<br>no salgo<br>al monte     | No                  |
| 17.- ¿Ha visto si los niños en la comunidad o sus niños saben de hongos?, ¿les permiten que los agarren, jueguen con ellos o los lleven a la casa? (I 8.1) | Si                   | No se                               | No                  |
| 18.- ¿Qué siente usted cuando va al monte y encuentra muchos hongos? (I 9.1)                                                                               | +                    | Ningún<br>sentimiento<br>particular | -                   |
| 19.- ¿Los hongos son importantes? ¿Por qué? (I 9.2)                                                                                                        | Si                   | No se                               | No                  |
